# Supplementary material for: A new measure to assess pain in people with haemophilia: The Multidimensional Haemophilia Pain Questionnaire (MHPQ)
Source: PubMed Central journal article supplement (PMC6261605; doi:10.1371/journal.pone.0207939), 2018-11-28
Supplement: pone.0207939.s001.pdf [file pone.0207939.s001.pdf]

## QUESTIONÁRIO MULTIDIMENSIONAL DE DOR NA HEMOFILIA

Patrícia Ribeiro Pinto, Ana Cristina Paredes & Armando Almeida, 2018

Instituto de Investigação em Ciências da Vida e da Saúde, Escola de Medicina, Universidade do Minho

A dor é um dos principais sintomas associados à hemofilia, que pode ser muito incapacitante. Para melhorar os cuidados prestados, é importante para todos os profissionais de saúde compreender melhor esta dor, pelo que gostaríamos que nos falasse da sua experiência com a dor relacionada com a hemofilia.

1. **Alguma vez** sentiu dores relacionadas com a hemofilia? Não  Sim
2. Sentiu dores relacionadas com a hemofilia **no último ano**? Não  Sim   
(Se respondeu **NÃO**, o questionário termina aqui)

3. A dor relacionada com a hemofilia apareceu **há mais de 3 meses**? Não  Sim
4. A dor relacionada com a hemofilia surge **mais do que uma vez por semana**? Não  Sim

Pensando nas dores que sentiu no **último ano**:

| Localização          | Assinale <b>todos</b> os locais onde <b>sente</b> ou <b>sentiu</b> dor no último ano | Assinale o local que lhe <b>dói</b> ou <b>doeu mais</b> no último ano<br>(Assinale apenas 1 opção) | Assinale o local cuja dor <b>mais prejudicou</b> a sua vida no último ano<br>( <b>teve maior impacto</b> )<br>(Assinale apenas 1 opção) |
|----------------------|--------------------------------------------------------------------------------------|----------------------------------------------------------------------------------------------------|-----------------------------------------------------------------------------------------------------------------------------------------|
| Ombro direito        | <input type="checkbox"/>                                                             | <input type="checkbox"/>                                                                           | <input type="checkbox"/>                                                                                                                |
| Ombro esquerdo       | <input type="checkbox"/>                                                             | <input type="checkbox"/>                                                                           | <input type="checkbox"/>                                                                                                                |
| Cotovelo direito     | <input type="checkbox"/>                                                             | <input type="checkbox"/>                                                                           | <input type="checkbox"/>                                                                                                                |
| Cotovelo esquerdo    | <input type="checkbox"/>                                                             | <input type="checkbox"/>                                                                           | <input type="checkbox"/>                                                                                                                |
| Pulso direito        | <input type="checkbox"/>                                                             | <input type="checkbox"/>                                                                           | <input type="checkbox"/>                                                                                                                |
| Pulso esquerdo       | <input type="checkbox"/>                                                             | <input type="checkbox"/>                                                                           | <input type="checkbox"/>                                                                                                                |
| Anca direita         | <input type="checkbox"/>                                                             | <input type="checkbox"/>                                                                           | <input type="checkbox"/>                                                                                                                |
| Anca esquerda        | <input type="checkbox"/>                                                             | <input type="checkbox"/>                                                                           | <input type="checkbox"/>                                                                                                                |
| Joelho direito       | <input type="checkbox"/>                                                             | <input type="checkbox"/>                                                                           | <input type="checkbox"/>                                                                                                                |
| Joelho esquerdo      | <input type="checkbox"/>                                                             | <input type="checkbox"/>                                                                           | <input type="checkbox"/>                                                                                                                |
| Tornozelo direito    | <input type="checkbox"/>                                                             | <input type="checkbox"/>                                                                           | <input type="checkbox"/>                                                                                                                |
| Tornozelo esquerdo   | <input type="checkbox"/>                                                             | <input type="checkbox"/>                                                                           | <input type="checkbox"/>                                                                                                                |
| Outras localizações: |                                                                                      |                                                                                                    |                                                                                                                                         |
| _____                | <input type="checkbox"/>                                                             | <input type="checkbox"/>                                                                           | <input type="checkbox"/>                                                                                                                |
| _____                | <input type="checkbox"/>                                                             | <input type="checkbox"/>                                                                           | <input type="checkbox"/>                                                                                                                |
| _____                | <input type="checkbox"/>                                                             | <input type="checkbox"/>                                                                           | <input type="checkbox"/>                                                                                                                |
| _____                | <input type="checkbox"/>                                                             | <input type="checkbox"/>                                                                           | <input type="checkbox"/>                                                                                                                |

No espaço abaixo, escreva (copie) o nome da **localização cuja dor mais prejudicou a sua vida no último ano e que assinalou na última coluna da tabela da página anterior** (Por exemplo, se na última coluna assinalou o espaço em frente à localização “joelho direito”, em baixo deverá escrever também “joelho direito”):

**Responda agora, por favor, às seguintes questões**  
**PENSANDO APENAS NA DOR DA LOCALIZAÇÃO QUE ESCREVEU ACIMA**

5. Aproximadamente, **há quanto tempo** apareceu essa dor? \_\_\_\_\_
6. **Quando** costuma/costumava doer? (assinale todas as opções que se se aplicam)
- a) Quando me magoo ou tenho uma hemorragia
  - b) Quando faço esforços ou certos movimentos
  - c) Todas as semanas, mas tenho dias sem dor
  - d) Todos os dias, mas tenho momentos sem dor
  - e) A dor está sempre presente, é contínua e constante
  - f) Outro: \_\_\_\_\_
7. Quando foi a **última vez** que doeu?
- Hoje  Na última semana  No último mês  Entre 1 e 6 meses  Entre 6 e 12 meses
8. Em que **momento do dia** dói mais?
- Manhã  Durante a tarde  Final do dia  À noite  Depende
9. Quais as **razões ou motivos** que associa à dor? (assinale todas as opções que se se aplicam)
- a) A dor surge quando tenho uma hemorragia
  - b) A dor surge quando faço algum esforço e/ou durante o movimento, quando tenho que realizar tarefas (ex. pegar em pesos) ou andar
  - c) A dor surge quando subo ou desço escadas
  - d) A dor surge depois de descansar ou estar parado (ex. após estar muito tempo deitado, como de manhã ao acordar ou quando me levanto de uma cadeira)
  - e) A dor surge mesmo quando estou quieto, parado, sentado ou deitado (ex. à noite quando estou deitado na cama)
  - f) A dor surge se fizer algum movimento acidental (movimento em falso, “sem querer”)
  - g) A dor surge quando há mudança das condições atmosféricas (sensibilidade às mudanças de tempo)
  - h) A dor está sempre presente, independentemente das circunstâncias
  - i) Outro motivo: \_\_\_\_\_

10. Para cada uma das situações descritas abaixo, assinale com um círculo, na escala de 0 a 10, o número que melhor descreve a **intensidade de dor habitual** que costuma sentir **na localização que assinalou anteriormente**, sendo que o valor “zero” corresponde a ausência de dor e “dez” corresponde à pior dor que pode imaginar.

a. Episódios de hemorragia

|         |             |   |   |              |   |   |            |   |   |                              |
|---------|-------------|---|---|--------------|---|---|------------|---|---|------------------------------|
| 0       | 1           | 2 | 3 | 4            | 5 | 6 | 7          | 8 | 9 | 10                           |
| Sem dor | Dor ligeira |   |   | Dor moderada |   |   | Dor severa |   |   | A pior dor que pode imaginar |

b. Quando faço algum esforço e/ou durante o movimento, quando tenho que realizar tarefas (ex. pegar em pesos) ou andar

|         |             |   |   |              |   |   |            |   |   |                              |
|---------|-------------|---|---|--------------|---|---|------------|---|---|------------------------------|
| 0       | 1           | 2 | 3 | 4            | 5 | 6 | 7          | 8 | 9 | 10                           |
| Sem dor | Dor ligeira |   |   | Dor moderada |   |   | Dor severa |   |   | A pior dor que pode imaginar |

c. Quando subo ou desço escadas

|         |             |   |   |              |   |   |            |   |   |                              |
|---------|-------------|---|---|--------------|---|---|------------|---|---|------------------------------|
| 0       | 1           | 2 | 3 | 4            | 5 | 6 | 7          | 8 | 9 | 10                           |
| Sem dor | Dor ligeira |   |   | Dor moderada |   |   | Dor severa |   |   | A pior dor que pode imaginar |

d. Depois de descansar ou estar parado (ex. após estar muito tempo deitado, como de manhã ao acordar ou quando me levanto de uma cadeira)

|         |             |   |   |              |   |   |            |   |   |                              |
|---------|-------------|---|---|--------------|---|---|------------|---|---|------------------------------|
| 0       | 1           | 2 | 3 | 4            | 5 | 6 | 7          | 8 | 9 | 10                           |
| Sem dor | Dor ligeira |   |   | Dor moderada |   |   | Dor severa |   |   | A pior dor que pode imaginar |

e. Quanto estou quieto, parado, sentado ou deitado (ex. à noite quando estou deitado na cama)

|         |             |   |   |              |   |   |            |   |   |                              |
|---------|-------------|---|---|--------------|---|---|------------|---|---|------------------------------|
| 0       | 1           | 2 | 3 | 4            | 5 | 6 | 7          | 8 | 9 | 10                           |
| Sem dor | Dor ligeira |   |   | Dor moderada |   |   | Dor severa |   |   | A pior dor que pode imaginar |

f. Quando faço algum movimento acidental (movimento em falso, “sem querer”)

|         |             |   |   |              |   |   |            |   |   |                              |
|---------|-------------|---|---|--------------|---|---|------------|---|---|------------------------------|
| 0       | 1           | 2 | 3 | 4            | 5 | 6 | 7          | 8 | 9 | 10                           |
| Sem dor | Dor ligeira |   |   | Dor moderada |   |   | Dor severa |   |   | A pior dor que pode imaginar |

11. Para cada uma das situações descritas abaixo, assinale com um círculo, na escala de 0 a 10, o número que melhor descreve a **interferência que a dor da articulação que assinalou anteriormente** costuma ter em cada uma das seguintes situações, sendo que o valor “zero” corresponde a nenhuma interferência e “dez” corresponde à máxima interferência.

a. Atividade Geral (todas as atividades do dia-a-dia)

|                   |                        |   |   |                         |   |   |                       |   |   |                         |
|-------------------|------------------------|---|---|-------------------------|---|---|-----------------------|---|---|-------------------------|
| 0                 | 1                      | 2 | 3 | 4                       | 5 | 6 | 7                     | 8 | 9 | 10                      |
| Sem interferência | Interfere ligeiramente |   |   | Interfere moderadamente |   |   | Interfere severamente |   |   | Interfere completamente |

b. Disposição (humor, estado de ânimo)

|                   |                        |   |   |                         |   |   |                       |   |   |                         |
|-------------------|------------------------|---|---|-------------------------|---|---|-----------------------|---|---|-------------------------|
| 0                 | 1                      | 2 | 3 | 4                       | 5 | 6 | 7                     | 8 | 9 | 10                      |
| Sem interferência | Interfere ligeiramente |   |   | Interfere moderadamente |   |   | Interfere severamente |   |   | Interfere completamente |

c. Capacidade para andar a pé

|                   |                        |   |   |                         |   |   |                       |   |   |                         |
|-------------------|------------------------|---|---|-------------------------|---|---|-----------------------|---|---|-------------------------|
| 0                 | 1                      | 2 | 3 | 4                       | 5 | 6 | 7                     | 8 | 9 | 10                      |
| Sem interferência | Interfere ligeiramente |   |   | Interfere moderadamente |   |   | Interfere severamente |   |   | Interfere completamente |

d. Trabalho normal (inclui tanto o trabalho doméstico como o trabalho fora de casa)

|                   |                        |   |   |                         |   |   |                       |   |   |                         |
|-------------------|------------------------|---|---|-------------------------|---|---|-----------------------|---|---|-------------------------|
| 0                 | 1                      | 2 | 3 | 4                       | 5 | 6 | 7                     | 8 | 9 | 10                      |
| Sem interferência | Interfere ligeiramente |   |   | Interfere moderadamente |   |   | Interfere severamente |   |   | Interfere completamente |

e. Relações com outras pessoas (relacionamento com amigos, familiares ou colegas)

|                   |                        |   |   |                         |   |   |                       |   |   |                         |
|-------------------|------------------------|---|---|-------------------------|---|---|-----------------------|---|---|-------------------------|
| 0                 | 1                      | 2 | 3 | 4                       | 5 | 6 | 7                     | 8 | 9 | 10                      |
| Sem interferência | Interfere ligeiramente |   |   | Interfere moderadamente |   |   | Interfere severamente |   |   | Interfere completamente |

f. Sono

|                   |                        |   |   |                         |   |   |                       |   |   |                         |
|-------------------|------------------------|---|---|-------------------------|---|---|-----------------------|---|---|-------------------------|
| 0                 | 1                      | 2 | 3 | 4                       | 5 | 6 | 7                     | 8 | 9 | 10                      |
| Sem interferência | Interfere ligeiramente |   |   | Interfere moderadamente |   |   | Interfere severamente |   |   | Interfere completamente |

g. Prazer de viver

|                   |                        |   |   |                         |   |   |                       |   |   |                         |
|-------------------|------------------------|---|---|-------------------------|---|---|-----------------------|---|---|-------------------------|
| 0                 | 1                      | 2 | 3 | 4                       | 5 | 6 | 7                     | 8 | 9 | 10                      |
| Sem interferência | Interfere ligeiramente |   |   | Interfere moderadamente |   |   | Interfere severamente |   |   | Interfere completamente |

12. A tabela seguinte apresenta algumas **estratégias que as pessoas usam para aliviar a dor**. Assinale as estratégias que utiliza habitualmente, ou que já utilizou, e indique, numa **escala de 0% a 100%**, a percentagem de alívio que sente ou sentiu com cada uma delas.

|                                                            | Faço ou já fiz isto      | Percentagem de alívio (0% - 100%) |
|------------------------------------------------------------|--------------------------|-----------------------------------|
| Medicação para as dores (analgésicos)/Pomadas*             | <input type="checkbox"/> | _____ %                           |
| Gelo                                                       | <input type="checkbox"/> | _____ %                           |
| Descanso/Repouso                                           | <input type="checkbox"/> | _____ %                           |
| Rezar/Orar                                                 | <input type="checkbox"/> | _____ %                           |
| Elevar a zona dolorosa/Mudar de posição                    | <input type="checkbox"/> | _____ %                           |
| Administração de fator                                     | <input type="checkbox"/> | _____ %                           |
| Relaxamento                                                | <input type="checkbox"/> | _____ %                           |
| Aplicação de calor                                         | <input type="checkbox"/> | _____ %                           |
| Compressão                                                 | <input type="checkbox"/> | _____ %                           |
| Bebidas alcoólicas                                         | <input type="checkbox"/> | _____ %                           |
| Fumar tabaco                                               | <input type="checkbox"/> | _____ %                           |
| Drogas recreativas (ex. cannabis)                          | <input type="checkbox"/> | _____ %                           |
| Massagens terapêuticas                                     | <input type="checkbox"/> | _____ %                           |
| Reiki/Meditação                                            | <input type="checkbox"/> | _____ %                           |
| Produtos naturais/Homeopatia/Naturopatia                   | <input type="checkbox"/> | _____ %                           |
| Técnicas de distração (ex. ir fazer outra coisa que gosto) | <input type="checkbox"/> | _____ %                           |
| Procura de apoio/companhia de familiares e/ou amigos       | <input type="checkbox"/> | _____ %                           |

|                                          |                          |         |
|------------------------------------------|--------------------------|---------|
| Outras estratégias para lidar com a dor: |                          |         |
| _____                                    | <input type="checkbox"/> | _____ % |
| _____                                    | <input type="checkbox"/> | _____ % |
| _____                                    | <input type="checkbox"/> | _____ % |

\* Se assinalou esta opção, indique o nome da medicação para as dores (analgésicos) e/ou pomadas que costuma usar:

---



---

13. Assinale, na lista de especialidades / terapias assinaladas abaixo, as **que já consultou** (ou **gostaria de consultar**) para ajudar a lidar com a dor:

|                                            | Já consultei             | Gostaria de consultar    |
|--------------------------------------------|--------------------------|--------------------------|
| Médicos da Hemofilia (Imunohemoterapeutas) | <input type="checkbox"/> | <input type="checkbox"/> |
| Médico de família                          | <input type="checkbox"/> | <input type="checkbox"/> |
| Ortopedista                                | <input type="checkbox"/> | <input type="checkbox"/> |
| Anestesiologista                           | <input type="checkbox"/> | <input type="checkbox"/> |
| Fisiatra                                   | <input type="checkbox"/> | <input type="checkbox"/> |
| Psiquiatra                                 | <input type="checkbox"/> | <input type="checkbox"/> |
| Psicólogo                                  | <input type="checkbox"/> | <input type="checkbox"/> |
| Fisioterapeuta                             | <input type="checkbox"/> | <input type="checkbox"/> |
| Acupuntura                                 | <input type="checkbox"/> | <input type="checkbox"/> |
| Meditação                                  | <input type="checkbox"/> | <input type="checkbox"/> |
| Reiki                                      | <input type="checkbox"/> | <input type="checkbox"/> |
| Outro:                                     |                          |                          |
| _____                                      | <input type="checkbox"/> | <input type="checkbox"/> |
| _____                                      | <input type="checkbox"/> | <input type="checkbox"/> |

**OU** Não consultei nenhuma destas especialidades / terapias para ajudar a lidar melhor com a dor

13. Globalmente, qual é o seu grau de **satisfação geral** em relação à forma como a sua dor tem sido tratada pelos profissionais de saúde?

Muito insatisfeito       Insatisfeito       Nem insatisfeito nem satisfeito       Satisfeito       Muito Satisfeito

**VERIFIQUE POR FAVOR SE RESPONDEU A TODAS AS QUESTÕES.**  
**Muito obrigado pela sua colaboração.**
